# Supplementary material for: Serum cystatin C to creatinine ratio is associated with sarcopenia in non-dialysis-dependent chronic kidney disease
Source: PubMed Central journal article supplement — Kidney Res Clin Pract. 2022 May 18;41(5):580–90. doi: 10.23876/j.krcp.21.214 (PMC9576455; doi:10.23876/j.krcp.21.214), 2022-05-18
Supplement: j-krcp-21-214-suppl1.pdf [file j-krcp-21-214-suppl1.pdf]

**Supplementary Table 1.** Baseline laboratory findings of the study population

| Variable                    | Total (n = 517)        | Cystatin C/creatinine ratio |                        |                        |                        | p-value |
|-----------------------------|------------------------|-----------------------------|------------------------|------------------------|------------------------|---------|
|                             |                        | Q1 (n = 128)                | Q2 (n = 130)           | Q3 (n = 130)           | Q4 (n = 129)           |         |
| Hemoglobin (g/dL)           | 12.2 (11.0–13.8)       | 12.3 (10.9–14.3)            | 12.8 (11.4–14.3)       | 12.1 (11.2–13.6)       | 11.9 (10.8–13.2)       | 0.009   |
| Total cholesterol (mg/dL)   | 153.0<br>(134.0–181.5) | 153.0<br>(134.0–189.0)      | 156.0<br>(133.5–180.5) | 150.0<br>(134.0–172.0) | 152.0<br>(133.0–183.0) | 0.89    |
| Total protein (g/dL)        | 7.1 (6.7–7.4)          | 7.0 (6.6–7.4)               | 7.1 (6.8–7.5)          | 7.1 (6.7–7.3)          | 7.0 (6.7–7.5)          | 0.59    |
| Serum albumin (g/dL)        | 4.2 (3.9–4.5)          | 4.3 (3.9–4.5)               | 4.3 (4.0–4.6)          | 4.2 (4.0–4.4)          | 4.1 (3.8–4.3)          | <0.001  |
| Uric acid (mg/dL)           | 6.2 (5.0–7.3)          | 6.1 (5.0–7.5)               | 6.5 (5.2–7.6)          | 6.2 (5.0–7.0)          | 6.1 (4.5–7.3)          | 0.24    |
| Blood urea nitrogen (mg/dL) | 25.7 (19.5–35.7)       | 28.3 (19.6–44.9)            | 23.7 (19.0–34.7)       | 25.9 (19.4–33.5)       | 25.3 (19.9–33.0)       | 0.04    |
| Serum creatinine (mg/dL)    | 1.6 (1.2–2.2)          | 2.2 (1.3–3.2)               | 1.5 (1.2–2.2)          | 1.6 (1.2–2.1)          | 1.4 (1.1–1.7)          | <0.001  |
| Cystatin C (mg/L)           | 1.7 (1.2–2.3)          | 1.7 (1.0–2.8)               | 1.5 (1.1–2.1)          | 1.8 (1.4–2.2)          | 1.9 (1.4–2.4)          | 0.002   |
| Sodium (mmol/L)             | 140.0<br>(138.0–141.0) | 140.0<br>(138.0–141.0)      | 140.0<br>(138.0–141.0) | 139.5<br>(138.0–141.3) | 139.0<br>(138.0–141.0) | 0.53    |
| Potassium (mmol/L)          | 4.6 (4.3–5.0)          | 4.7 (4.3–5.1)               | 4.5 (4.3–4.9)          | 4.6 (4.3–5.0)          | 4.6 (4.3–4.9)          | 0.46    |
| Calcium (mg/dL)             | 9.3 (9.0–9.7)          | 9.3 (8.9–9.7)               | 9.5 (9.1–9.8)          | 9.4 (9.0–9.8)          | 9.3 (8.9–9.7)          | 0.04    |
| Phosphorus (mg/dL)          | 3.6 (3.3–4.1)          | 3.6 (3.3–4.1)               | 3.6 (3.2–4.0)          | 3.7 (3.3–4.0)          | 3.7 (3.2–4.2)          | 0.89    |
| Total CO2 (mmol/L)          | 25.0 (23.0–28.0)       | 25.0 (22.0–28.0)            | 25.0 (23.8–28.0)       | 25.0 (23.0–27.0)       | 25.0 (23.0–28.0)       | 0.30    |

Data are expressed as median (interquartile range).

Female: Q1, 0.246–0.986; Q2, 0.993–1.150; Q3, 1.152–1.302; Q4, 1.314–2.836. Male: Q1, 0.422–0.829; Q2, 0.833–0.955; Q3, 0.956–1.078; Q4, 1.079–2.686.
