# Supplementary material for: Serum cystatin C to creatinine ratio is associated with sarcopenia in non-dialysis-dependent chronic kidney disease
Source: PubMed Central journal article supplement — Kidney Res Clin Pract. 2022 May 18;41(5):580–90. doi: 10.23876/j.krcp.21.214 (PMC9576455; doi:10.23876/j.krcp.21.214), 2022-05-18
Supplement: j-krcp-21-214-suppl2.pdf [file j-krcp-21-214-suppl2.pdf]

**Supplementary Table 2. Correlation analysis of sarcopenia index with clinical parameters**

| Parameter             | Cystatin C/Cr                       |         | $\Delta$ (Cystatin C – sCr)         |         |
|-----------------------|-------------------------------------|---------|-------------------------------------|---------|
|                       | Correlation coefficient ( $\beta$ ) | P-value | Correlation coefficient ( $\beta$ ) | p-value |
| <b>Male</b>           |                                     |         |                                     |         |
| Age                   | 0.358                               | <0.001  | 0.251                               | <0.001  |
| Lean tissue index     | -0.372                              | <0.001  | -0.295                              | <0.001  |
| Fat tissue index      | 0.121                               | 0.03    | 0.145                               | 0.007   |
| Handgrip strength     | -0.254                              | <0.001  | -0.142                              | 0.01    |
| eGFR                  | 0.08                                | 0.14    | 0.279                               | <0.001  |
| Pulse pressure        | 0.149                               | 0.006   | 0.073                               | 0.18    |
| Body mass index       | -0.117                              | 0.03    | -0.066                              | 0.22    |
| Hemoglobin            | -0.216                              | <0.001  | 0.027                               | 0.62    |
| Uric acid             | -0.096                              | 0.08    | -0.057                              | 0.3     |
| Total cholesterol     | -0.036                              | 0.5     | 0.028                               | 0.61    |
| Total protein         | -0.094                              | 0.08    | 0.002                               | 0.98    |
| Albumin               | -0.225                              | <0.001  | -0.059                              | 0.28    |
| Total CO <sub>2</sub> | -0.023                              | 0.67    | 0.106                               | 0.05    |
| <b>Female</b>         |                                     |         |                                     |         |
| Age                   | 0.349                               | <0.001  | 0.382                               | <0.001  |
| Lean tissue index     | -0.280                              | <0.001  | -0.306                              | <0.001  |
| Fat tissue index      | 0.176                               | 0.02    | 0.188                               | 0.01    |
| Handgrip strength     | -0.262                              | 0.001   | -0.297                              | <0.001  |
| eGFR                  | 0.228                               | 0.002   | 0.156                               | 0.04    |
| Pulse pressure        | -0.005                              | 0.94    | 0.03                                | 0.7     |
| Body mass index       | 0.043                               | 0.58    | 0.039                               | 0.6     |
| Hemoglobin            | 0.011                               | 0.89    | 0.022                               | 0.77    |
| Uric acid             | 0.13                                | 0.09    | 0.176                               | 0.02    |
| Total cholesterol     | -0.045                              | 0.56    | 0.001                               | 0.99    |
| Total protein         | 0.054                               | 0.48    | 0.122                               | 0.11    |
| Albumin               | -0.012                              | 0.88    | 0.027                               | 0.72    |
| Total CO <sub>2</sub> | 0.154                               | 0.04    | 0.167                               | 0.03    |

Cr, creatinine; eGFR, estimated glomerular filtration rate; sCr, serum Cr.
