# Supplementary material for: Serum cystatin C to creatinine ratio is associated with sarcopenia in non-dialysis-dependent chronic kidney disease
Source: PubMed Central journal article supplement — Kidney Res Clin Pract. 2022 May 18;41(5):580–90. doi: 10.23876/j.krcp.21.214 (PMC9576455; doi:10.23876/j.krcp.21.214), 2022-05-18
Supplement: j-krcp-21-214-suppl3.pdf [file j-krcp-21-214-suppl3.pdf]

**Supplementary Table 3. Logistic regression analysis for the prevalence of sarcopenia, low LTI, and low HGS**

| Cystatin C/creatinine ratio (cut-off value) | Unadjusted       |         | Model 1          |         | Model 2          |         | Model 3          |         |
|---------------------------------------------|------------------|---------|------------------|---------|------------------|---------|------------------|---------|
|                                             | OR (95% CI)      | p-value | aOR (95% CI)     | p-value | aOR (95% CI)     | p-value | aOR (95% CI)     | p-value |
| <b>Sarcopenia</b>                           |                  |         |                  |         |                  |         |                  |         |
| <1.032                                      | Reference        |         | Reference        |         | Reference        |         | Reference        |         |
| ≥1.032                                      | 2.10 (1.40–3.14) | <0.001  | 1.28 (0.82–1.99) | 0.27    | 1.40 (0.86–2.28) | 0.18    | 1.76 (1.03–3.01) | 0.04    |
| <b>Low LTI</b>                              |                  |         |                  |         |                  |         |                  |         |
| <1.037                                      | Reference        |         | Reference        |         | Reference        |         | Reference        |         |
| ≥1.037                                      | 2.66 (1.78–3.96) | <0.001  | 1.72 (1.11–2.66) | 0.02    | 1.76 (1.10–2.83) | 0.02    | 2.00 (1.21–3.31) | 0.007   |
| <b>Low HGS</b>                              |                  |         |                  |         |                  |         |                  |         |
| <1.018                                      | Reference        |         | Reference        |         | Reference        |         | Reference        |         |
| ≥1.018                                      | 2.18 (1.52–3.11) | <0.001  | 1.13 (0.75–1.71) | 0.56    | 1.15 (0.74–1.80) | 0.53    | 1.26 (0.77–2.06) | 0.36    |

Model 1: adjusted for age and body mass index. Model 2: adjusted for diabetes mellitus and hypertension in addition to model 1. Model 3: adjusted for albumin, hemoglobin, and estimated glomerular filtration rate in addition to model 2.

aOR, adjusted odds ratio; CI, confidence interval; HGS, handgrip strength; LTI, lean tissue index; OR, odds ratio.
