# Supplementary material for: Serum cystatin C to creatinine ratio is associated with sarcopenia in non-dialysis-dependent chronic kidney disease
Source: PubMed Central journal article supplement — Kidney Res Clin Pract. 2022 May 18;41(5):580–90. doi: 10.23876/j.krcp.21.214 (PMC9576455; doi:10.23876/j.krcp.21.214), 2022-05-18
Supplement: j-krcp-21-214-suppl4.pdf [file j-krcp-21-214-suppl4.pdf]

**Supplementary Table 4.** Logistic regression analysis for the prevalence of sarcopenia, low LTI, and low HGS categorized according to the CKD stage

| CKD-EPI sCr<br>eGFR | Cystatin C/Cr ratio    |         |                       |         |                        |         |                         |         |
|---------------------|------------------------|---------|-----------------------|---------|------------------------|---------|-------------------------|---------|
|                     | Unadjusted             |         | Model 1               |         | Model 2                |         | Model 3                 |         |
|                     | OR (95% CI)            | p-value | aOR (95% CI)          | p-value | aOR (95% CI)           | p-value | aOR (95% CI)            | p-value |
| <b>Sarcopenia</b>   |                        |         |                       |         |                        |         |                         |         |
| ≥60                 | 5.65 (1.39–22.90)      | 0.02    | 3.26 (0.75–14.28)     | 0.12    | 2.13 (0.37–12.35)      | 0.4     | 1.31 (0.12–14.45)       | 0.83    |
| <60, ≥45            | 3.46 (0.36–33.70)      | 0.29    | 0.55 (0.04–8.61)      | 0.67    | 1.66 (0.08–36.39)      | 0.75    | 1.14 (0.02–53.43)       | 0.95    |
| <45, ≥30            | 12.99 (2.30–73.34)     | 0.004   | 4.51 (0.77–26.33)     | 0.09    | 5.74 (0.95–34.88)      | 0.06    | 5.08 (0.83–31.03)       | 0.08    |
| <30                 | 16.75<br>(3.38–82.91)  | 0.001   | 9.13<br>(1.65–50.41)  | 0.01    | 13.20<br>(1.89–92.47)  | 0.009   | 17.65<br>(1.72–180.88)  | 0.02    |
| <b>Low LTI</b>      |                        |         |                       |         |                        |         |                         |         |
| ≥60                 | 18.86 (3.90–91.26)     | <0.001  | 9.63 (1.94–47.84)     | 0.006   | 6.12 (1.14–32.86)      | 0.04    | 2.52 (0.32–19.79)       | 0.38    |
| <60, ≥45            | 9.17<br>(1.16–72.57)   | 0.04    | 1.19<br>(0.10–14.77)  | 0.89    | 4.88<br>(0.21–114.88)  | 0.33    | 16.23<br>(0.28–930.55)  | 0.18    |
| <45, ≥30            | 12.26 (2.24–67.29)     | 0.004   | 4.37 (0.77–24.91)     | 0.1     | 4.39 (0.77–25.11)      | 0.1     | 4.84 (0.82–28.62)       | 0.08    |
| <30                 | 17.47<br>(3.46–88.10)  | 0.001   | 11.84<br>(2.08–67.35) | 0.005   | 17.61<br>(2.52–123.10) | 0.004   | 30.49<br>(3.01–309.03)  | 0.004   |
| <b>Low HGS</b>      |                        |         |                       |         |                        |         |                         |         |
| ≥60                 | 5.87 (1.60–21.55)      | 0.008   | 3.89 (1.02–14.88)     | 0.047   | 3.98 (0.91–17.33)      | 0.07    | 1.89 (0.38–9.47)        | 0.44    |
| <60, ≥45            | 24.00<br>(2.91–197.81) | 0.003   | 7.30<br>(0.68–78.71)  | 0.1     | 9.36<br>(0.66–132.96)  | 0.1     | 60.20<br>(1.86–1950.32) | 0.02    |
| <45, ≥30            | 34.02<br>(5.14–225.25) | <0.001  | 6.90<br>(0.95–50.10)  | 0.06    | 15.30<br>(1.67–140.06) | 0.02    | 7.88<br>(0.84–73.57)    | 0.07    |
| <30                 | 7.20 (1.55–33.43)      | 0.01    | 1.30 (0.22–7.49)      | 0.77    | 0.65 (0.10–4.50)       | 0.66    | 0.26 (0.02–2.94)        | 0.28    |

Model 1: adjusted for age and body mass index. Model 2: adjusted for diabetes mellitus and hypertension in addition to model 1. Model 3: adjusted for albumin, hemoglobin, and eGFR in addition to model 2.

aOR, adjusted odds ratio; CI, confidence interval; CKD-EPI, Chronic Kidney Disease-Epidemiology Collaboration; eGFR, estimated glomerular filtration rate; HGS, handgrip strength; LTI, lean tissue index; OR, odds ratio; sCr, serum creatinine.
