# Supplementary figures and images for: Serum cystatin C to creatinine ratio is associated with sarcopenia in non-dialysis-dependent chronic kidney disease
Source: PubMed Central journal article supplement — Kidney Res Clin Pract. 2022 May 18;41(5):580–90. doi: 10.23876/j.krcp.21.214 (PMC9576455; doi:10.23876/j.krcp.21.214), 2022-05-18

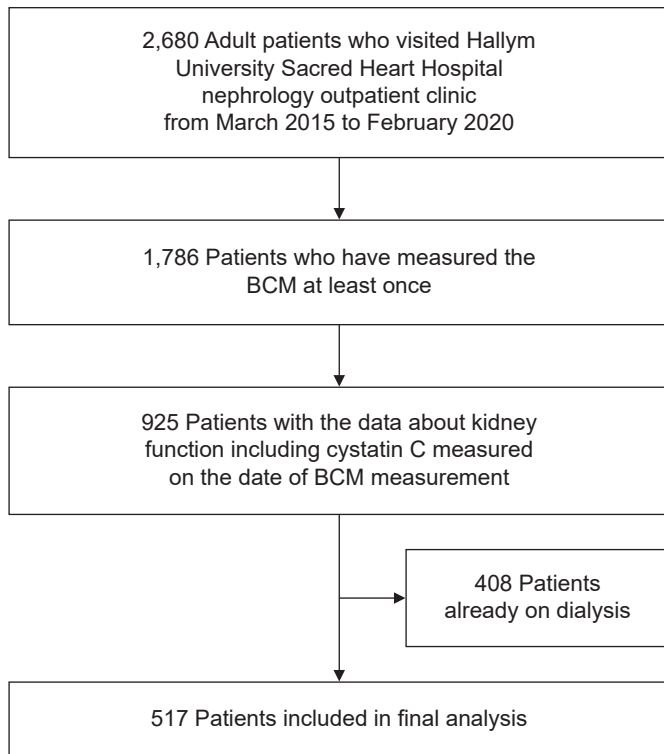

**Supplementary Figure 1. Study enrollment algorithm.**

BCM, body composition monitor.

Supplement: j-krcp-21-214-suppl5.pdf [file j-krcp-21-214-suppl5.pdf]
